# Supplementary material for: Concerted evolution reveals co-adapted amino acid substitutions in Na+K+-ATPase of frogs that prey on toxic toads
Source: bioRxiv or medRxiv preprint supplement (doi:10.1101/2020.08.04.234435), 2020-09-12
Supplement: Supplementary file [file media-1.pdf]

1  
2  
3  
4  
5  
6  
7  
8  
9  
10  
11  
12  
13  
14  
15  
16  
17  
18  
19  
20  
21  
22  
23  
24

## Supplementary Materials for

Concerted evolution reveals co-adapted amino acid substitutions in frogs that prey on toxic toads.

Shabnam Mohammadi\*, Lu Yang\*, Arbel Harpak\*, Santiago Herrera Álvarez, María del Pilar Rodríguez-Ordoñez, Julie Peng, Karen Zhang, Jay F. Storz, Susanne Dobler, Andrew J. Crawford\*\* & Peter Andolfatto\*\*

\*Co-first authorship

\*\*Correspondence to: [andrew@dna.ac](mailto:andrew@dna.ac), [pa2543@columbia.edu](mailto:pa2543@columbia.edu)

**This PDF file includes:**

- Table of Contents
- Materials and Methods
- Tables S1 to S8
- Figs. S1 to S7

**Table of Contents****Materials and Methods**

|                                                                                          |    |
|------------------------------------------------------------------------------------------|----|
| Sample collection and data sources                                                       | 5  |
| RNA-seq based gene discovery of ATP1A paralogs                                           | 5  |
| Targeted sequencing of protein-coding regions of ATP1A1 paralogs                         | 6  |
| <i>De novo</i> genome assembly of <i>Leptodactylus fuscus</i>                            | 6  |
| Targeted long-read sequencing of intronic sequences of ATP1A1                            | 7  |
| Estimation of genealogical relationships                                                 | 8  |
| Maximum likelihood analysis of site-wise support for alternative tree topologies         | 9  |
| Theoretical single-site model for the probability of maintaining an adapted substitution | 10 |
| Simulations of ATP1A1 gene family evolution                                              | 13 |
| Inference of evolutionary parameters using Approximate Bayesian Computation              | 16 |
| Construction of expression vectors                                                       | 19 |
| Generation of recombinant viruses and transfection into Sf9 cells                        | 21 |
| Preparation of Sf9 cell membranes                                                        | 22 |
| Verification by SDS-PAGE and western blotting                                            | 23 |
| Ouabain inhibition assay (measurement of CG resistance)                                  | 23 |
| ATP hydrolysis assay (measurement of ATPase activity as a proxy for protein activity)    | 24 |
| Statistical analyses of biochemical assay results                                        | 24 |

## Supplementary Tables

|                                                                                                                                              |    |
|----------------------------------------------------------------------------------------------------------------------------------------------|----|
| Table S1. Collection information for samples of leptodactylid frogs used in this study                                                       | 26 |
| Table S2. Sources of ATP1A1 sequences included in the phylogenetic analysis                                                                  | 27 |
| Table S3. Summary of the <i>de novo</i> genome assembly of <i>Leptodactylus fuscus</i>                                                       | 29 |
| Table S4. Fisher’s exact test (FET) for the likelihood of site-wise support of “Non-Concerted” and “Concerted” topologies.                   | 30 |
| Table S5. List of primers used for intron sequencing                                                                                         | 31 |
| Table S6. List of engineered ATP1A1 constructs used to test functional effects of amino acid substitutions in <i>Leptodactylus</i> .         | 32 |
| Table S7. Summary of the ouabain sensitivity and catalytic properties of Na <sup>+</sup> , K <sup>+</sup> -ATPase for each ATP1A1 construct. | 33 |
| Table S8. Statistical analysis of ouabain sensitivity and ATPase activity.                                                                   | 34 |

## Supplementary Figures

|                                                                                                                                                                        |    |
|------------------------------------------------------------------------------------------------------------------------------------------------------------------------|----|
| Figure S1. Proportion of ATP1A1, ATP1A2, and ATP1A3 paralogs in brain, muscle, and stomach of seven Anuran species.                                                    | 35 |
| Figure S2. Variation among sites implicated in CG-resistance for ATPA paralogs of various species.                                                                     | 36 |
| Figure S3. Positions of 12 R-copy-specific amino acid substitutions on the crystal structure of pig ATP1A1 bound to the cardiac glycoside bufalin.                     | 37 |
| Figure S4. Annotation of ATP1A1S and ATP1A1R paralogs in <i>Leptodactylus fuscus</i> <i>de novo</i> genome assembly.                                                   | 38 |
| Figure S5. A phylogenetic tree of <i>Leptodactylus</i> and outgroup species.                                                                                           | 39 |
| Figure S6. Western blot analysis of Na <sup>+</sup> , K <sup>+</sup> -ATPase with engineered ATP1A1 (α) subunits produced in this study.                               | 40 |
| Figure S7. Cardiac glycoside (ouabain) inhibition curves for six each recombinant <i>Leptodactylus</i> Na <sup>+</sup> , K <sup>+</sup> -ATPase produced in this study | 41 |

28

29

30



## 31 **Materials and Methods**

### 32 Sample collection and data sources

33 We sampled tissues from 16 anuran species. Five *Leptodactylus* species, as well as  
34 *Engystomops pustulosus*, *Lithodytes lineatus*, and *Rhinella marina*, were collected from different  
35 geographic locations in Colombia (Table S1) and stored in RNAlater (Invitrogen) at -80°C until  
36 used. A tissue sample of the toad, *Atelopus zeteki*, was donated by the Smithsonian's National  
37 Zoo and came from a necropsied captive animal. The outgroup species, *Megophrys nasuta*,  
38 *Kaloula pulchra*, *Rana sphenocephala*, *Rana catesbeiana*, *Dendrobates auratus*,  
39 *Melanophryniscus stelzneri*, and *Duttaphrynus melanostictus* were obtained from the pet trade  
40 under IACUC Protocol No. 2057-16. Live animals were euthanized under the supervision of a  
41 research veterinarian at Princeton University. To capture all three paralogs of ATP1A, we  
42 collected tissue samples from brain, skeletal muscle, and stomach – each of which highly  
43 expresses at least one of the three paralogs (15).

### 45 RNA-seq based gene discovery of ATP1A paralogs

46 Full-length coding sequences of ATP1A1, ATP1A2 and ATP1A3 were reconstructed for  
47 several species using RNA-seq based gene discovery. Total RNA was extracted from multiple  
48 tissues of 16 anuran species (Table S2) using TRIzol Reagents (Ambion, Life technologies)  
49 following the manufacturer's protocol. RNA-seq libraries were prepared with TruSeq RNA  
50 Library Prep Kit v2 (Illumina) and sequenced on Illumina HiSeq2500 (Genomics Core Facility,  
51 Princeton, NJ, USA) with either PE 75bp or SE 140bp (Table S2). Reads were trimmed and *de*  
52 *novo* assembled with Trinity v2.2.0 (40). ATP1A1 of *Xenopus laevis* (GenBank  
53 NM\_001090595) was initially used to BLAST against the assembled transcripts of *L. latrans* to

54 recover ATP1A1S and ATP1A1R, which were later used as queries to reconstruct ATP1A1  
55 genes from other species. ATP1A paralogs for the rest of the species used in this study were  
56 mined from publicly available data (Table S2) following the same pipeline.

57

#### 58 Targeted sequencing of protein-coding regions of ATP1A1 paralogs

59 Total RNA was extracted from *L. fuscus*, *L. insularum*, and *L. colombiensis* as described  
60 above and reverse-transcribed to single-strand cDNA using SuperScript III Reverse  
61 Transcriptase (Invitrogen). ATP1A1 was amplified using Phusion High-Fidelity DNA  
62 polymerase (Invitrogen) using forward primer: 5'-ATAAGTATGAGCCCGCAGCC-3' and  
63 reverse primer: 5'-CCAGGGCTGCGTCTGATTATG-3'. PCR products were cleaned with  
64 QIAquick PCR Purification Kit (Qiagen) and A-tailed with Taq Polymerase (NEB) before  
65 cloning into a pTOPO-TA vector (Invitrogen). The presence of the insert in the plasmid was  
66 confirmed by colony-PCR. Illumina-ready sequencing libraries of isolated plasmids were  
67 prepared with Tn5 transposase, charged with Illumina-ready indexed barcodes (22), and  
68 sequenced on Illumina MiSeq (Genomics Core Facility, Princeton, NJ, USA). *De novo* assembly  
69 of the cloned PCR products was performed with Velvet v1.2.10 (41) and Oases v0.2.8 (42).  
70 ATP1A1 paralogs were reconstructed by aligning with previously obtained ATP1A1 sequences  
71 of *L. latrans* and *L. pentadactylus*.

72

#### 73 *De novo* genome assembly of *Leptodactylus fuscus*

74 High-molecular-weight genomic DNA was isolated from a single *Leptodactylus fuscus*  
75 individual (Table S1, JSM 205) following standard protocols. This was used to prepare a 10X-  
76 genomics Chromium library and sequenced on Illumina HiSeq X sequencer. Barcodes were

77 removed using the Long Ranger basic v2.2.2 ([https://support.10xgenomics.com/genome-  
79 exome/software/downloads/latest](https://support.10xgenomics.com/genome-<br/>78 exome/software/downloads/latest)). Trimmed reads were used for k-mer estimation in Jellyfish  
(33, v2.2.7). The k-mer (k=21) frequency distribution was processed in GenomeScope (43) to  
80 estimate the genome size, heterozygosity, and percentage of repeat content. The linked-reads  
81 were assembled using the Supernova assembler (44) with “-accept-extreme-coverage” specified  
82 because the coverage was lower than recommended. The assembled genome is 2.42 Gb (16,530  
83 scaffolds  $\geq$ 10 kb, scaffold N50 = 363 kb, Table S3) and was outputted in the pseudohap2  
84 format (accession No. TBD). The completeness of the genome assembly was assessed using  
85 Benchmarking Universal Single-Copy Orthologs (BUSCOs, v4.0.5 (45)), and 72.6% of the  
86 BUSCO Tetrapoda gene annotations (version odb10) were identified (Table S3).

87

#### 88 Targeted long-read sequencing of intronic sequences of ATP1A1

89 Intron annotations were determined by blasting (blast-2.26) the protein-coding  
90 sequences of ATP1A1 S and ATP1A1 R against the *L. fuscus* genome assembly (Figure S4). For  
91 the other four *Leptodactylus* species (*L. pentadactylus*, *L. latrans*, *L. insularum*, and *L.*  
92 *colombiensis*) and two outgroup species (*Engystomops pustulosus* and *Lithodytes lineatus*),  
93 introns were obtained via targeted long-read sequencing using Oxford Nanopore MinION.  
94 Genomic DNA was extracted with Agencourt DNAdvance Kit (Beckman Coulter, France) and  
95 ATP1A1 was amplified using LongAmp *Taq* PCR kit (NEB) using customized species-specific  
96 barcoded primers (Table S5). PCR products were gel confirmed and isolated using QIAquick  
97 PCR Purification kit (Qiagen). Libraries were pooled and prepared for sequencing using Ligation  
98 Sequencing Kit SQK-LSK109 (Oxford Nanopore Technologies) following the manufacturer’s  
99 protocol. 72,161 reads were generated within six hours, 89% passed the filter, and the real-time

100 read length distribution matched that shown on the gel image of the amplicons. Base-calling  
101 from raw trace data was performed using Albacore v2.3.4 (Oxford Nanopore Technologies) and  
102 sequences were demultiplexed using LAST v980 (46). Reads that mapped to more than one  
103 barcode were discarded. Reads were assigned to each species based on barcodes using seqtk  
104 (47). Only reads of the expected length  $\pm$  200 nt were used for downstream analyses. For  
105 *Leptodactylus* species with two ATP1A1 paralogs, reads were further split by perfectly matching  
106 the 111-122 region of the two copies, which exhibit 22-25% difference in nucleotide sequences.  
107 Assembly was carried out using Canu v1.8 (48) and 1000 reads (i.e. 1000x coverage) were  
108 randomly selected for better performance. Reconstructed sequences were identical when  
109 different sets of 1000 reads were used. Filtered reads were mapped back to the reconstructed  
110 reference with minimap2 (49) and polished with racon v1.3.3 (50). Short-read sequencing data  
111 were generated using Tn5 transposase-based Illumina sequencing (as described above) to further  
112 correct and polish the sequences. Final sequences were aligned using MUSCLE (51)  
113 implemented in SeaView (52). The boundaries between introns and exons were manually  
114 adjusted to start with GT and end with AG. Sequences are available at Genbank MT422192 -  
115 422203 (Table S2).

116

### 117 Estimation of genealogical relationships

118 A time-tree of anuran species in Figure 1A was derived from Feng *et al.* (38). Amino acid  
119 substitutions at sites that are implicated in cardenolide sensitivity (22) are shown. The nucleotide  
120 tree and protein tree (Figure. 1B, C) of *Leptodactylus* and outgroup species were built with the  
121 exons and introns and protein sequences (Table S2), respectively. Phylogenies for ATP1A1 were

122 estimated using a maximum likelihood method implemented in SeaView and visualized in  
123 EvolView (53)

124 We constructed a multi-locus species tree for three *Leptodactylus* species (*L. fuscus*, *L.*  
125 *pentadactylus*, *L. latrans*) and two outgroups (*Engystomops pustulosus* and *Lithodytes lineatus*)  
126 with high-confidence split time estimates specifically for use in the analyses described in  
127 sections “*Theoretical single-site model for the probability of maintaining an adapted*  
128 *substitution*” and “*Simulations of ATP1A1 gene family evolution*”. Protein-coding genes were  
129 predicted from *de novo* transcriptome assemblies for each species using Augustus (v3.2.2) (54)  
130 and queried against the Tetrapoda ortholog database (odb10, <https://www.orthodb.org>) using  
131 BLAST (tblastn). A concatenated multi-alignment of mRNA sequences was created for 813  
132 orthologous proteins longer than 100 amino acids that were shared among all five species. The  
133 best-fit nucleotide substitution model for each protein (i.e. each initial partition) was first  
134 determined using the “ModelFinder” function of IQ-TREE 2 (v.2.0.4; 55) (command line:  
135 `iqtree2 -s concat_813_mafft.fasta -spp partition.txt -m MFP -nt AUTO -safe --prefix`  
136 `concat_813_partition_MFP`). Proteins with the same inferred mutation model were subsequently  
137 merged into the same partition (using “-m TESTMERGE”) prior to phylogenetic inference  
138 (command line: `iqtree2 -s concat_813_mafft.fasta -spp partition_MFP_best_scheme.nex -m`  
139 `TESTMERGE -nt AUTO --prefix concat_813_partition_MFP_merged`).

140

#### 141 Maximum likelihood analysis of site-wise support for alternative tree topologies

142 We used site-wise likelihoods to evaluate the relative level of statistical support for two  
143 alternative tree topologies relating to the origin of R/S ATP1A1 paralogs: Model 1 (“Non-  
144 Concerted”) posits a single ancient origin of a R/S duplication with no concerted evolution:

145 ((Lfus\_S,(Lpen\_S,(Lins\_S,Llat\_S,Lcol\_S))),(Lfus\_R,(Lpen\_R,(Lins\_R,Llat\_R,Lcol\_R)))).  
146 Model 2 (“Concerted”) is the expected topology under concerted evolution: ((Lfus\_S, Lfus\_R),  
147 ((Lpen\_S, Lpen\_R), ((Lins\_S, Lins\_R), (Llat\_S, Llat\_R), (Lcol\_S, Lcol\_R)))). We note that the  
148 speciation events are assumed to follow the order inferred in the section “*Estimation of*  
149 *genealogical relationships*”. For each nucleotide states (e.g. AAAATTTTTT, in the order of  
150 Lfus\_S, Lfus\_R, Lpen\_S, LpenR, Llat\_S, LlatR, LcolS, LcolR, LinsS, LinsR), likelihoods for the  
151 two topologies were calculated using *PAML 4.8 baseml* (56). We consider  $|\Delta\log\text{-likelihood}| \geq 2$ ,  
152 as significant support for one topology over the other. 4-, 2-, 0-fold degenerate sites were  
153 classified using *MEGA 7* (57) and all variants at these sites were categorized as either  
154 synonymous or nonsynonymous. We used Fisher’s Exact Test to test the hypothesis that the ratio  
155 of synonymous and nonsynonymous variants is independent of support for one of the topologies  
156 over the other (Table S4).

157 We further tested whether synonymous variants supporting alternative tree topologies (as  
158 outlined above) are equally distant from R/S distinguishing substitutions: We computed the  
159 distance of each variant from the nearest R/S distinguishing substitution, and compared the  
160 median distance of synonymous variants with  $|\Delta\log\text{-likelihood}| \geq 2$  support for the “Non-  
161 Concerted” genealogy to a random sample of synonymous variants supporting multiple origins.

162

### 163 Theoretical single-site model for the probability of maintaining an adapted substitution

164 Below, we describe the model and parameters used to compute the probability of  
165 maintaining a diverged substitution in two gene copies.

166 **Model.** We consider a single biallelic amino acid site in tandemly duplicated genes,  
167 evolving for  $t$  years. The two gene copies are initially fixed for the two distinct alleles. The site

168 experiences mutation at rate  $2\mu$  (or  $4\mu$  for both copies) where  $\mu$  is the per-nucleotide mutation  
 169 rate, assuming for simplicity that all sites are biallelic, all mutations in the first two positions of  
 170 the codon are nonsynonymous and all mutations at the third position are synonymous. The site  
 171 also experiences non-allelic gene conversion at rate  $4c$  (for both copies) and is under purifying  
 172 selection with fitness cost  $s > 0$ , such that having two distinct alleles at the two copies confers a  
 173 fitness of 1 and having the same allele confers to fitness  $(1 - s)$ .

174 *De novo* mutations (through point mutation or gene conversion) from the initial distinct-  
 175 allele haplotype to a same-allele haplotype can occur in all haplotypes in the population. In a  
 176 diploid population of size  $N$ , *de novo* same-allele haplotypes arise at rate

$$177 \quad P(\textit{de novo same - allele haplotype}) = 2N \cdot 4 \cdot (\mu + c).$$

178 The probability of fixation is bounded by the neutral case of  $s = 0$ , such that

$$179 \quad P(\textit{same - allele haplotype fixes}) < \frac{1}{2N}.$$

180 If

$$181 \quad 8N \cdot (\mu + c) \ll 1$$

182 and

$$183 \quad \frac{1}{2N} \ll 1,$$

184 then the overall per-year rate of fixation for deleterious haplotypes,  $\alpha$ , can be approximated by  
 185 the product of these two,

$$186 \quad \alpha = P(\textit{de novo same - allele haplotype}) \cdot P(\textit{same - allele haplotype fixes}) =$$

$$187 \quad 8N(c + \mu) \cdot \frac{e^s - 1}{e^{2Ns} - 1},$$

188 where we replaced  $P(\textit{deleterious haplotype fixes})$  with Kimura's fixation probability for a  
 189 deleterious allele (58, 59). Assuming a vanishingly small probability of back-mutations—

190 namely, that no fixation of a same-allele haplotype is followed by another fixation reversing the  
191 haplotype back to the distinct alleles—the probability of maintaining the distinct-alleles  
192 haplotype for  $t$  years is:

$$193 \quad P(\text{maintenance of distinct alleles}) = (1 - \alpha)^t = \left(1 - 8N(c + \mu) \frac{e^s - 1}{e^{2Ns} - 1}\right)^t. \quad (1)$$

194 We note that if  $s \ll 1$  then

$$195 \quad e^s \approx 1 + s,$$

196 and therefore

$$197 \quad P(\text{maintenance of distinct alleles}) \approx \left(1 - 4(c + \mu) \frac{2Ns}{e^{2Ns} - 1}\right)^t, \quad (2)$$

198 giving a maintenance probability that is only dependent on the effective population size and the  
199 selection coefficient through the compound population parameter  $2Ns$ .

200 **Parameters.** To compute maintenance probabilities, we set the point mutation rate to its  
201 estimate by Sun *et al.* (60) (also supported by earlier work from Crawford (61)) of

$$202 \quad \mu = 0.776 \cdot 10^{-9} \text{ mutations per bp per year.} \quad (3)$$

203 We wished to use the total branch length of the *Leptodactylus* phylogeny for  $t$ , the  
204 maintenance time, to reflect the observation of trans-specific maintenance. In considering the  
205 phylogenetic tree and split times here and in the evolutionary simulations of the section  
206 “Simulations of ATP1A1 gene family evolution” below, we only considered a subset of three  
207 *Leptodactylus* species—*L. fuscus*, *L. latrans* and *L. pentadactylus*—for which confident species  
208 split time estimates were available (see “*Estimation of genealogical relationships*” section; Fig.  
209 S5): a split between *L. fuscus* and the common ancestor of the two other species 29,187,798  
210 years ago, followed by a split between *L. latrans* and *L. pentadactylus* 27,426,120 years ago.  
211 Therefore, the total time on the species tree was set to



212  $t = 2 \cdot 29,187,798 + 27,426,120 = 85,801,716 \text{ years.}$  (4)

213

214 The maintenance probabilities shown in Fig. 3A were computed using eq. (1), plugging in the

215 parameters in eq. (3) and (4) and across a grid of  $(Ns) \in [-1,1.5]$  and  $c \in [0,2.5]$  values.

216

### 217 Simulations of ATP1A1 gene family evolution

218 **Overview.** We developed evolutionary simulations with the goal of gauging the

219 evolutionary parameters that could have produced the observed spatial divergence patterns along

220 ATP1A1. Typically, and whenever possible, analytic likelihood or posterior probability

221 functions are derived for such a task. Alternatively, backward-in-time simulations are used,

222 because of their high computational efficiency. However, analytic or backward-in-time

223 approaches were intractable for our purposes: both because we wished to account for the spatial

224 divergence patterns and not consider sites independently—and because our model of ATP1A1

225 evolution in *Leptodactylus* includes complex interactions between point mutation, NAGC, and

226 selection that violate typical assumptions of analytic / backward in time sequence evolution

227 models. We therefore developed a forward-in-time simulation of R and S. The simulations take

228 a set of parameters  $\theta$  as input (see section “Fitness model and other parameterization” below),

229 start with two ancestral sequences and end with an output of contemporary R and S sequences in

230 multiple *Leptodactylus* species, which we later compare to the observed data (see section

231 “Inference of evolutionary parameters using Approximate Bayesian Computation”).

232 **Fitness model and other parameterization.** At the heart of our simulation, we consider

233 the possible fixation of new haplotypes in *Leptodactylus* lineages. These fixations follow random

234 occurrence of de novo point mutations or NAGC in one of the haplotypes in the population; but

235 the probability of fixation on the lineage will depend on the selection acting on the novel variant.

236 The ancestral haplotype with which the simulation begins is assumed to underlie the  
237 optimal function of R, S and interactions between them, and thus to be of optimal fitness.  
238 Therefore, the absolute fitness  $f$  of a haplotype  $X$  at any point of the simulation depends on its  
239 divergence from the ancestral haplotype with which the simulation begins, as follows:

$$240 \quad f(X) = s_1X_1 + s_2X_2 + s_yY + s_zZ + s_{12}X_1X_2 + s_{1y}X_1Y + s_{2y}X_2Y,$$

241 where  $X_1 \in \{0,1,2\}$  is the number of residue differences between  $X$  and the ancestral haplotype at  
242 position 111 of the amino acid sequences of both R and S;  $X_2 \in \{0,1,2\}$  is the number of residue  
243 differences between  $X$  and the ancestral haplotype at position 122;  $Y \in \{0,1, \dots, 20\}$  is the  
244 number of residue differences between  $X$  and the ancestral haplotype at the other 10 R/S  
245 distinguishing substitutions (referring to the substitutions strongly distinguishing R and S in the  
246 observed sequences); and  $Z$  is the number of total residue differences between  $X$  and the  
247 ancestral haplotype in the rest of the amino acid sequence.  $\{s_1, s_2, s_y, s_z, s_{12}, s_{1y}, s_{2y}\}$  represent  
248 selection coefficients and are fixed parameters that are taken as input of the simulation.

249 Other parameters taken as input by our simulation (see pseudocode below) include:

- 250 -  $N$ , the population size of each extant *Leptodactylus* lineage
- 251 -  $\mu$ , the per haplotype, per nucleotide per year mutation rate.
- 252 -  $l$ , the mean NAGC tract length in base pairs. We model the tract length as Geometrically  
253 distributed (39, 62).
- 254 -  $c$ , the NAGC per nucleotide per year rate. Note that this is the rate in which a site is included in  
255 a NAGC tract, not the rate at which NAGC events initiate at the site.
- 256 - A rooted species tree, consisting of a bifurcating topology and branch lengths (split times) in  
257 years.

258 **Simulation pseudocode:**

259           1. Initialize time  $t$  to the TMRCA of all species.

260           2. While  $t < \text{today}$ ,

261                 2.1. Advance  $t$  by  $t_w$ , the waiting time for the next mutational event, where

262                  $t_w \sim \text{Exp}((2N \text{ haplotypes}) \cdot (\text{extant species}) \cdot$

263                  $(2 \text{ paralogs per species}) \cdot (\text{ATP1A1 sequence length}) \cdot$

264                  $(\text{rate per nucleotide } c + \mu))$

265                 2.2 If  $t > \text{time for lineage split that had not yet occurred}$ ,

266                         2.2.1 bifurcate lineage: copy R and S sequences of ancestral lineage into

267                         an identical copy and label each of the two sets as one of the lineages.

268                 2.3 Draw  $U_{\text{event}} \sim U(0,1)$ . if  $U_{\text{event}} < \frac{\mu}{\mu+c}$  then the de novo mutational event is

269                 a point mutation, else, it is a NAGC event.

270                 2.4 Draw (uniformly) an extant species in which the event occurred.

271                 2.5 Draw (uniformly) a paralog (R or S) in which the mutation occurred or

272                 served as the template for NAGC.

273                 2.6 Draw (uniformly) a random nucleotide position where the mutational

274                 event occurred.

275                 2.7 If the de novo event is a NAGC event,

276                         2.5.1 Draw a tract length  $L \sim \text{Geo}(l)$ . Expand tract around initiation site,

277                         with a uniform fraction extending to the left and right of the site.

278                 2.8 Translate the derived, de novo haplotype and the ancestral haplotype to

279                 amino acid sequences and calculate their fitness; calculate the resulting

280                 relative fitness of the derived haplotype.

281 2.9 Calculate  $p_{fix}$ , the fixation probability (see below) for a haplotype at  
282 frequency  $\frac{1}{2N}$  conferring relative fitness as calculated in 2.8.

283 2.10 Draw  $U_{fix} \sim U(0,1)$ . If  $U_{fix} < p_{fix}$ ,

284 2.10.1 Fix: Replace ancestral haplotype in the species with the *de novo*  
285 haplotype.

286 In step 2.9, we consider a *de novo* haplotype arising in the population (namely, at  
287 frequency  $\frac{1}{2N}$ ) with relative fitness  $1 + s$  to have probability  
288 frequency  $\frac{1}{2N}$ ) with relative fitness  $1 + s$  to have probability

$$289 \quad p_{fix} = \begin{cases} \frac{e^s - 1}{e^{2Ns} - 1} & \text{if } s < 0 \text{ (deleterious)} \\ \frac{1}{2N} & \text{if } s = 0 \text{ (neutral)} \\ \frac{1 - e^{-s}}{1 - e^{-2Ns}} & \text{if } s > 0 \text{ (advantageous)} \end{cases}$$

290 of fixing in the population, following Kimura (58).

291 of fixing in the population, following Kimura (58).

292

## 293 Inference of evolutionary parameters using Approximate Bayesian Computation

294 **Overview.** We used an Approximate Bayesian Computation (ABC) approach to estimate  
295 evolutionary parameters, including gene conversion rates and the strength of purifying selection  
296 acting at different sites in ATP1A1. In each iteration  $j$ , we sampled a set of parameters  $\theta_j$  from a  
297 predefined prior distribution. We approximated the posterior distribution of  $\theta_j$  by the empirical  
298 distribution given by a subset of this sample that generates divergence patterns that we inferred  
299 as closest to the true data. To infer the “distance” of simulated data from the observed data, we  
300 ran forward-in-time evolutionary simulations of ATP1A1 sequence evolution and quantified the

301 similarity of the simulated divergence patterns to the observed divergence patterns. Simulations  
 302 all begin with the same ancestral R and S genes in a common ancestor, and end with six evolved  
 303 (simulated) contemporary sequences, corresponding to R and S in three *Leptodacylus* species.  
 304 From the divergence patterns between these six simulated sequences, we computed  $d(\theta_j)$ , the  
 305 distance between the simulated and the observed (real sequence data) ATP1A1 divergence  
 306 patterns.

307 **Parameter set and prior distribution.** Our evolutionary simulations take as input a set  
 308 of parameters as defined in the section “Simulations of ATP1A1 gene family evolution”,

$$309 \quad \theta = \{\mu, c, l, N, s_1, s_2, s_z, s_y, s_{12}, s_{1y}, s_{2y}\}.$$

310 The prior distributions of single parameters are mutually independent. Namely, the prior  
 311 distribution on  $\theta$  was set as

$$312 \quad \pi(\theta) = \pi_c(c)\pi_{\tilde{s}}(\tilde{s})\pi_{s_z}(s_z),$$

313 where  $\pi_K$  is the marginal prior distribution of  $K$ , and  $\tilde{s} := s_1 = s_2 = s_y$  such that all 12 sites  
 314 distinguishing R and S in the observed data are under the same selective constraint, but it is free  
 315 to differ from the selective constraint on other amino acids. The marginal priors on the gene  
 316 conversion rate  $c$  and selection coefficients  $\tilde{s}$ ,  $s_z$  were set as

$$317 \quad \log_{10}\left(\frac{c}{\mu}\right) \sim U(0, 2.5),$$

$$318 \quad \log_{10}(N\tilde{s}) \sim U(-1, 1)$$

319 and

$$320 \quad \log_{10}(Ns_y) \sim U(-1, 1).$$

321 The other parameters were assumed fixed: we set the mutation rate to be  $\mu = 0.776 \cdot 10^{-9}$   
 322 mutations per bp per year and the diploid population size (in each extant species at a given time  
 323 in the simulation) to be  $N=10$  ( $2N=20$ ) as in the section “Theoretical single-site model for the

324 probability of maintaining an adapted substitution”. This small population size was chosen to  
 325 allow for computational efficiency, because the simulation run time scaled linearly with  $N$ , and  
 326 our inference became computationally infeasible with substantially larger population sizes. The  
 327 mean tract length for gene conversion events was set to  $l = 100bp$ . We have found that there is  
 328 very limited resolution given by our inference scheme on selection interaction terms,  $s_{12}$ ,  $s_{1y}$  and  
 329  $s_{2y}$  when we allowed them to vary. We therefore set these fitness interaction terms to zero.

330 **Measuring similarity to observed divergence patterns.** Given  $y$ , a set of R and S  
 331 nucleotide sequences in three species, we computed two summaries of the divergence at each  
 332 nucleotide site  $i$ :  $d_o(y_i)$ , the sum of pairwise Hamming distances between R sequences in a pair  
 333 of species (each  $\in \{0,1\}$  since only one site is considered) plus the sum of pairwise Hamming  
 334 distances between R sequences; and  $d_p(y_i)$ , the sum—across the three species—of Hamming  
 335 distances between paralogous R and S sequences. Let  $y^{obs}$  be the six observed sequences and  
 336  $y^{\theta_j}$  be the sequences output at the end of simulation run  $j$ . We measured the divergence between  
 337 the simulated and observed data at site  $I$  as

$$338 \quad d_i(\theta_j) = d_i(y^{obs}, y^{\theta_j}) = d_o(y_i^{obs}, y_i^{\theta_j}) + d_p(y_i^{obs}, y_i^{\theta_j}).$$

339 This per-site distance was computed for all positions  $I$ , namely nucleotide sites without missing  
 340 data or insertions/deletions in any of the six observed sequences. Finally, the distance between  
 341 simulation  $j$  and the observed data is given by

$$342 \quad d(\theta_j) = \sum_{\text{sites } i} w_i d_i(y^{obs}, y^{\theta_j}),$$

343 where  $w_i$  are position-importance weights, giving extra weight for divergence patterns near R/S  
 344 distinguishing sites. These weights were set as

345 
$$w_i = 1 + \sum_{k=1}^{12} 10 \cdot e^{-|i-i_k|},$$

346 where  $\{i_k\}$  is the set of  $12 \cdot 3$  positions coding for one of the 12 R/S distinguishing substitution  
 347 sites.

348 **Analysis.** We ran 23,323 simulations with  $\Theta$  sampled from its prior distribution. We kept  
 349 ~1% of these parameter sets—234 sets which produced simulations with the lowest  $d(\cdot)$  values,  
 350 and considered them as samples from the approximate posterior distribution. We then used the  
 351 functions *kde3d* (for the approximate posterior distribution of  $c, s_z$  and  $\tilde{s}$ ) and *kde2d* (for the  
 352 marginal approximate posterior distribution of  $c$  and  $\tilde{s}$ ) from the R packages *misc3d* (63) and  
 353 *MASS* (64) to estimate the posterior with a spline fit using over 200 bins per dimension, in the  
 354 range set by our prior distribution on each parameter, and with otherwise default settings of  
 355 *kde3d* and *kde2d*. The approximate posterior mode was

356 
$$(c = 18\mu, 2N\tilde{s} = 6, 2Ns_z = 1),$$

357 and the marginal posterior mode on the first two parameters was

358 
$$(c = 9\mu, 2N\tilde{s} = 7).$$

359 The (single dimension) marginal credible interval mentioned in the main text are high  
 360 posterior density credible intervals.

361

362 Construction of expression vectors

363  $\text{Na}^+, \text{K}^+$ -ATPase is a multi-subunit protein that requires co-expression of the alpha (ATP1A)  
 364 and beta subunits (ATP1B) in cell lines. An RNA-seq analysis of *Leptodactylus* brain, stomach,  
 365 and muscle tissues revealed that ATP1B1, one of four paralogous copies of ATP1B, is the most  
 366 ubiquitously expressed. cDNA was reverse transcribed from *Leptodactylus latrans* stomach  
 367 mRNA using the Superscript III Reverse Transcriptase kit (Invitrogen™). The ATP1B1 gene

368 was amplified from cDNA with the primers,  
369 5'ATCCTCGAGATGGCCAGAGACAAAACCAAGGA 3' and 5'  
370 TGTGGTACCTCAGCTACTCTTAATCTCCAACCTTTA 3', which added a XhoI site at the 5'  
371 end and a KpnI site at the 3' end. ATP1B1 amplicons were inserted into pFastBac Dual  
372 expression vectors (Life Technologies) at the p10 promoter with XhoI and KpnI (FastDigest;  
373 Thermo Scientific<sup>TM</sup>), and then control sequenced. The vector insert sequence was an identical  
374 match to the *L. latrans*  $\beta$ 1-subunit transcript generated in this study. ATP1A1S was amplified  
375 from cDNA with the primers 5' TAATACTAGTATGGGATACGGGGCCGGACGTGAT 3'  
376 and 5' ACTGCGGCCGCTTAATAATAGGTTTCTTTCTCCA 3' and ATP1A1R was amplified  
377 from a previously constructed vector containing a truncated copy of the gene with the overhang  
378 primers 5'  
379 TAATACTAGTATGGGATACGGGGCCGGACGTGATGAGTATGAGCCCGCAGCCACTT  
380 CTGAACATGGCGGCAAGAAGAAAGGCAAAGGGAAGGATAAGGAT 3' and 5'  
381 ACTGCGGCCGCTTAATAATAGGTTTCTTTCTCCACCCAGCCGCCAGGGCTGCGTCTG  
382 ATTATCAGTTTTTCGGATTTTCATCATATATGAAGATGAGCAGAGAGTAGGGGAAGGC  
383 ACAGAACCACCATGTTGGTTTCAGTGGGTACATGCGGAGTGCCACATCCATGCCTGG  
384 G 3'. Both pairs of primers added a SpeI site at the 5' end and a NotI site at the 3' ends. All gene  
385 amplifications were performed using a high-fidelity proofreading polymerase (Phusion High-  
386 Fidelity DNA Polymerase; Thermo Scientific<sup>TM</sup>). ATP1A1S and ATP1A1R amplicons were  
387 inserted at the P<sub>PH</sub> promoter of pFastBac Dual expression vectors already containing ATP1B1  
388 with SpeI and NotI (FastDigest; Thermo Scientific<sup>TM</sup>), and then control sequenced. The  
389 ATP1A1S sequence was an identical match to the *L. latrans* sensitive  $\alpha$ 1-subunit transcripts and  
390 the ATP1A1R sequence was an identical match to *L. latrans* resistant  $\alpha$ 1-subunit transcripts



391 generated from this study. *Escherichia coli* DH5 $\alpha$  cells (Invitrogen<sup>TM</sup>) were transformed with the  
392 two resulting expression vectors (pFastBac Dual + ATP1B1 + ATP1A1S and pFastBac Dual +  
393 ATP1B1 + ATP1A1R). These completed vectors were then used to introduce the amino acid  
394 codons of interest by site-directed mutagenesis (QuikChange II XL Kit; Agilent Technologies,  
395 La Jolla, CA, USA) according to the manufacturer's protocol. One ATP1A1S gene construct was  
396 synthesized by Invitrogen<sup>TM</sup> GeneArt (S+12R). All resulting vectors had the  $\alpha$ 1-subunit gene  
397 under the control of the P<sub>PH</sub> promoter and the  $\beta$ 1-subunit gene under the p10 promoter (Table  
398 S6).

399

#### 400 Generation of recombinant viruses and transfection into Sf9 cells

401 *Escherichia coli* DH10bac cells harboring the baculovirus genome (bacmid) and a  
402 transposition helper vector (Life Technologies) were transformed according to the  
403 manufacturer's protocol with expression vectors containing the different gene constructs.  
404 Recombinant bacmids were selected through PCR screening, grown, and isolated (65).  
405 Subsequently, Sf9 cells ( $4 \times 10^5$  cells\*ml) in 2 ml of Insect-Xpress medium (Lonza,  
406 Walkersville, MD, USA) were transfected with recombinant bacmids using Cellfectin reagent  
407 (Life Technologies). After a three-day incubation period, recombinant baculoviruses were  
408 isolated (P1) and used to infect fresh Sf9 cells ( $1.2 \times 10^6$  cells\*ml) in 10 ml of Insect-Xpress  
409 medium (Lonza, Walkersville, MD, USA) with 15 mg/ml gentamycin (Roth, Karlsruhe,  
410 Germany) at a multiplicity of infection of 0.1. Five days after infection, the amplified viruses  
411 were harvested (P2 stock).

412

413

414 Preparation of Sf9 cell membranes

415 For production of recombinant Na<sup>+</sup>,K<sup>+</sup>-ATPase, Sf9 cells were infected with the P2 viral  
416 stock at a multiplicity of infection of 1e3. The cells (1.6 x 10<sup>6</sup> cells\*ml) were grown in 50 ml of  
417 Insect-Xpress medium (Lonza, Walkersville, MD, USA) with 15 mg/ml gentamycin (Roth,  
418 Karlsruhe, Germany) at 27°C in 500 ml flasks (33). After 3 days, Sf9 cells were harvested by  
419 centrifugation at 20,000 x g for 10 min. The cells were stored at -80 °C, and then resuspended at  
420 0 °C in 15 ml of homogenization buffer (0.25 M sucrose, 2 mM EDTA, and 25 mM  
421 HEPES/Tris; pH 7.0). The resuspended cells were sonicated at 60 W (Bandelin Electronic  
422 Company, Berlin, Germany) for three 45 s intervals at 0 °C. The cell suspension was then  
423 subjected to centrifugation for 30 min at 10,000 x g (J2-21 centrifuge, Beckmann-Coulter,  
424 Krefeld, Germany). The supernatant was collected and further centrifuged for 60 min at 100,000  
425 x g at 4 °C (Ultra- Centrifuge L-80, Beckmann-Coulter) to pellet the cell membranes. The  
426 pelleted membranes were washed once and resuspended in ROTIPURAN® p.a., ACS water  
427 (Roth) and stored at -20 °C. Protein concentrations were determined by Bradford assays using  
428 bovine serum albumin as a standard. Six biological replicates were produced for each Na<sup>+</sup>,K<sup>+</sup>-  
429 ATPase construct.

430

431 Verification by SDS-PAGE and western blotting

432 For each biological replicate, 50 ug of protein were solubilized in 4x SDS-polyacrylamide  
433 gel electrophoresis sample buffer and separated on SDS gels containing 10% acrylamide.  
434 Subsequently, they were blotted on nitrocellulose membrane (HP42.1, Roth). To block non-  
435 specific binding sites after blotting, the membrane was incubated with 5% dried milk in TBS-  
436 Tween 20 for 1 h. After blocking, the membranes were incubated overnight at 4 °C with the

437 primary monoclonal antibody  $\alpha 5$  (Developmental Studies Hybridoma Bank, University of Iowa,  
438 Iowa City, IA, USA). Since only membrane proteins were isolated from transfected cells,  
439 detection of the  $\alpha$  subunit also indicates the presence of the  $\beta$  subunit. The primary antibody was  
440 detected using a goat-anti-mouse secondary antibody conjugated with horseradish peroxidase  
441 (Dianova, Hamburg, Germany). The staining of the precipitated polypeptide-antibody complexes  
442 was performed by addition of 60 mg 4-chloro-1 naphthol (Sigma-Aldrich, Taufkirchen, Germany)  
443 in 20 ml ice-cold methanol to 100 ml phosphate buffered saline (PBS) containing 60  $\mu$ l 30%  
444  $H_2O_2$ . See Fig. S6.

445

#### 446 Ouabain inhibition assay (measurement of CG resistance)

447 To determine the sensitivity of each  $Na^+,K^+$ -ATPase construct against the water-soluble  
448 cardiac glycoside, ouabain (Acrōs Organics), 100  $\mu$ g of each protein was pipetted into each well  
449 in a nine-well row on a 96-well microplate (Fisherbrand) containing stabilizing buffers (see  
450 buffer formulas in (66)). Each well in the nine-well row was exposed to exponentially decreasing  
451 concentrations ( $10^{-3}$  M,  $10^{-4}$  M,  $10^{-5}$  M,  $10^{-6}$  M,  $10^{-7}$  M,  $10^{-8}$  M, dissolved in distilled  $H_2O$ ) of  
452 ouabain, distilled water only (experimental control), and a combination of an inhibition buffer  
453 lacking KCl and  $10^{-2}$  M ouabain to measure background ATPase activity (see (66)). The proteins  
454 were incubated at  $37^\circ C$  and 200 rpms for 10 minutes on a microplate shaker (Quantifoil  
455 Instruments, Jena, Germany). Next, ATP (Sigma Aldrich) was added to each well and the  
456 proteins were incubated again at  $37^\circ C$  and 200 rpms for 20 minutes. The activity of  $Na^+,K^+$ -  
457 ATPases following ouabain exposure was determined by quantification of inorganic phosphate  
458 (Pi) released from enzymatically hydrolyzed ATP. Reaction Pi levels were measured according  
459 to the procedure described by Taussky and Shorr (67) (see (66)). All assays were run in duplicate

460 and the average of the two technical replicates was used for subsequent statistical analyses.

461 Absorbance for each well was measured at 650 nm with a plate absorbance reader (BioRad

462 Model 680 spectrophotometer and software package).

463

#### 464 ATP hydrolysis assay (measurement of ATPase activity as a proxy for protein activity)

465 To determine the functional efficiency of different Na<sup>+</sup>,K<sup>+</sup>-ATPase constructs, we

466 calculated the amount of Pi hydrolyzed from ATP per mg of protein per minute. The

467 measurements were obtained from the same assay as described above. In brief, absorbance from

468 the experimental control reactions, in which 100 ug of protein was incubated without any

469 inhibiting factors (i.e., ouabain or buffer excluding KCl), were measured and translated to mM Pi

470 from a standard curve that was run in parallel (1.2 mM Pi, 1 mM Pi, 0.8 mM Pi, 0.6 mM Pi, 0.4

471 mM Pi, 0.2 mM Pi, 0 mM Pi).

472

#### 473 Statistical analyses of biochemical assay results

474 Background phosphate absorbance levels from reactions with inhibiting factors were used

475 to calibrate phosphate absorbance in wells measuring ouabain inhibition and in the control wells

476 (66). For ouabain sensitivity measurements, calibrated absorbance values were converted to

477 percentage non-inhibited Na<sup>+</sup>,K<sup>+</sup>-ATPases activity based on measurements from the control

478 wells (66). These data were plotted and log IC<sub>50</sub> values were obtained for each biological

479 replicate from nonlinear fitting using a four-parameter logistic curve, with the top asymptote set

480 to 100 and the bottom asymptote set to zero (Fig. S7). Curve fitting was performed with the

481 nlsLM function of the minipack.lm library in R. For comparisons of recombinant protein ATPase

482 activity, the calculated Pi concentrations of 100 ug of protein assayed in the absence of ouabain

483 were converted to nmol Pi/mg protein/min. We used ANOVA to test for effects of substitutions  
484 on ouabain resistance (log IC<sub>50</sub>) and enzyme activity (Table S8; Levene's Test for Homogeneity  
485 of Variance for IC<sub>50</sub>:  $F_{7,40}=0.68$   $p=0.69$  and enzyme activity:  $F_{7,40}=0.31$   $p=0.94$ ). We used linear  
486 regression to estimate effect sizes associated with substitutions and pairwise t-tests to identify  
487 significant differences between substitution combinations (Table S8). All statistical analyses  
488 were implemented in R.

489 **Table S1. Collection information for samples of leptodactylid frogs used in this study.**  
 490 ANDES-A refers to the Amphibian collection of the *Museo de Historia Natural C. J. Marinkelle*  
 491 of the Universidad de los Andes, Bogotá, Colombia. Collector acronyms are Andrew J. Crawford  
 492 (AJC), Juan Salvador Mendoza (JSM), Juan Manuel Padial (JMP). All collecting sites are  
 493 located in Colombia (CO). Samples without museum voucher IDs are in the process of being  
 494 accessioned into the ANDES-A collection.  
 495

| Species                            | Museum ID    | Field ID | Data type | Locality                        | Latitude, longitude |
|------------------------------------|--------------|----------|-----------|---------------------------------|---------------------|
| <i>Engystomops pustulosus</i>      |              | AJC 3734 | RNA-seq   | Mariquita, Tolima, CO.          | 05.2635, -074.891   |
| <i>Engystomops pustulosus</i>      |              | JSM 228  | intron    | Zambrano, Bolívar, CO           | 09.75, -074.8333    |
| <i>Lithodytes lineatus</i>         |              | AJC 6408 | RNA-seq   | <i>pending</i>                  |                     |
| <i>Lithodytes lineatus</i>         | ANDES-A 2536 | AJC 2406 | intron    | Trubon, Río Vaupés, Vaupés, CO. | 01.21, -070.62      |
| <i>Leptodactylus fuscus</i>        | ANDES-A 3141 | AJC 5344 | plasmid   | Neiva, Huila, CO.               | 02.8796, -075.2757  |
| <i>Leptodactylus fuscus</i>        |              | JSM 205  | genome    | Garzón, Huila, CO.              | 02.2058, -075.6440  |
| <i>Leptodactylus pentadactylus</i> | ANDES-A 2327 | AJC 4761 | RNA-seq   | Leticia, Amazonas, CO.          | -03.865, -070.2061  |
| <i>Leptodactylus pentadactylus</i> | ANDES-A 949  | JMP 2179 | intron    | Leticia, Amazonas, CO.          | -04.10592, -069.25  |
| <i>Leptodactylus latrans</i>       |              | AJC 3653 | RNA-seq   | Puerto Carreño, Vichada, CO.    | 06.10, -067.483     |
| <i>Leptodactylus latrans</i>       | ANDES-A 1148 | AJC 3430 | intron    | Orocué, Casanare, CO.           | 04.9093, -071.4286  |
| <i>Leptodactylus insularum</i>     | ANDES-A 3146 | AJC 5345 |           | Neiva, Huila, CO.               | 02.8441, -075.3328  |
| <i>Leptodactylus insularum</i>     |              | AJC 3752 | CDS       | Montería, Córdoba, CO.          | 08.7917, -075.8629  |
| <i>Leptodactylus insularum</i>     |              | JSM 261  | intron    | Barú, Bolívar, CO.              | 10.1458, -075.6792  |
| <i>Leptodactylus colombiensis</i>  |              | AJC 5510 |           | Santa María, Boyacá, CO.        | 04.8499, -073.2653  |
| <i>Leptodactylus colombiensis</i>  | ANDES-A 3066 | AJC 3755 | CDS       | Nilo, Cundinamarca, CO.         | 04.3584, -074.5649  |
| <i>Leptodactylus colombiensis</i>  |              | AJC 4301 | intron    | San Martín, Meta, CO.           | 03.6969, -073.6986  |

496

497 **Table S2. Sources of ATP1A1 sequences included in the phylogenetic analysis (Fig. 1).** New  
 498 data generated by this study are indicated by blue text (RNA-seq datasets: PRJNA627222,  
 499 genome assembly: PRJNA631731).  
 500

| Species                            | Data type and format                            | Accession                                                                              |
|------------------------------------|-------------------------------------------------|----------------------------------------------------------------------------------------|
| <i>Atelopus zeteki</i>             | RNA-seq, PE 140 bp                              | skin: SRR11583991                                                                      |
| <i>Bombina maxima</i>              | RNA-seq, PE 90 bp                               | skin: SRR566619                                                                        |
| <i>Bufotes viridis</i>             | RNA-seq, PE 100 bp                              | SRR2163277                                                                             |
| <i>Craugastor fitzingeri</i>       | RNA-seq, SE 100 bp                              | skin: SRR1560905                                                                       |
| <i>Cyclorana alboguttata</i>       | RNA-seq, SE 105 bp                              | muscle: SRR619475                                                                      |
| <i>Dendrobates auratus</i>         | RNA-seq, PE 150 bp                              | brain: SRR11583990<br>muscle: SRR11583979<br>stomach: SRR11583968<br>CDS: MT813444     |
| <i>Duttaphrynus melanostictus</i>  | RNA-seq, PE 150 bp                              | brain: SRR11583966<br>muscle: SRR11583965<br>stomach: SRR11583964<br>CDS: MT813445     |
| <i>Engystomops pustulosus</i>      | RNA-seq, PE 140 bp                              | brain: SRR11583963<br>stomach: SRR11583962<br>CDS: MT396181                            |
|                                    | <i>de novo</i> assembly<br>long-read sequencing | partial gene: MT422192                                                                 |
| <i>Fejervarya cancrivora</i>       | RNA-seq, PE 100 bp                              | SRR1554290                                                                             |
| <i>Homo sapiens</i>                | NCBI reference sequence                         | NM_001160233.1                                                                         |
| <i>Kaloula pulchra</i>             | RNA-seq, PE 150 bp                              | muscle: SRR11583961<br>stomach: SRR11583989<br>CDS: MT813446                           |
| <i>Leptobrachium boringii</i>      | RNA-seq, PE 100 bp                              | SRR4436787                                                                             |
| <i>Leptodactylus colombiensis</i>  | cloning, plasmid sequencing                     | CDS: MT396187 (ATP1A1S)<br>MT396188 (ATP1A1R)                                          |
|                                    | long-read sequencing                            | partial gene: MT422198 (ATP1A1S)<br>MT422199 (ATP1A1R)                                 |
| <i>Leptodactylus fuscus</i>        | cloning, plasmid sequencing                     | CDS: MT396183 (ATP1A1S)<br>MT396184 (ATP1A1R)                                          |
|                                    | single-molecule genomic sequencing              | <i>de novo</i> assembly: TBD<br>partial gene: MT422194 (ATP1A1S)<br>MT422195 (ATP1A1R) |
| <i>Leptodactylus insularum</i>     | cloning, plasmid sequencing                     | CDS: MT396191 (ATP1A1S)<br>MT396192 (ATP1A1R)                                          |
|                                    | long-read sequencing                            | partial gene: MT422202 (ATP1A1S)<br>MT422203 (ATP1A1R)                                 |
| <i>Leptodactylus latrans</i>       | RNA-seq, SE 140 bp                              | brain: SRR11583988<br>stomach: SRR11583987                                             |
|                                    | <i>de novo</i> assembly                         | CDS: MT396189 (ATP1A1S)<br>MT396190 (ATP1A1R)                                          |
|                                    | long-read sequencing                            | partial gene: MT422200 (ATP1A1S)<br>MT422201 (ATP1A1R)                                 |
| <i>Leptodactylus pentadactylus</i> | RNA-seq, SE 140 bp                              | brain: SRR11583986<br>stomach: SRR11583985                                             |

|                                   |                         |                                                                   |
|-----------------------------------|-------------------------|-------------------------------------------------------------------|
|                                   | <i>de novo</i> assembly | CDS: MT396185 (ATP1A1S)<br>MT396186 (ATP1A1R)                     |
|                                   | long-read sequencing    | partial gene: MT422196 (ATP1A1S)<br>MT4221957 (ATP1A1R)           |
| <i>Limnodynastes peronii</i>      | RNA-seq, PE 100 bp      | SRR8712702                                                        |
| <i>Lithodytes lineatus</i>        | RNA-seq, PE 75 bp       | muscle: SRR11583984<br>stomach: SRR11583983                       |
|                                   | <i>de novo</i> assembly | CDS: MT396182                                                     |
|                                   | long-read sequencing    | partial gene: MT422193                                            |
| <i>Mantella betsileo</i>          | RNA-seq, PE 90 bp       | skin: SRR7592160                                                  |
| <i>Megophrys nasuta</i>           | RNA-seq, PE 150 bp      | brain: SRR11583982<br>muscle: SRR11583981<br>stomach: SRR11583980 |
|                                   | <i>de novo</i> assembly | CDS: MT813448                                                     |
| <i>Melanophryniscus stelzneri</i> | RNA-seq, PE 150 bp      | brain: SRR11583978<br>muscle: SRR11583977<br>stomach: SRR11583976 |
|                                   | <i>de novo</i> assembly | CDS: MT813449                                                     |
| <i>Odorrana tormota</i>           | RNA-seq, PE 150 bp      | skin: SRR6896138                                                  |
| <i>Oreobates cruralis</i>         | RNA-seq, PE 126 bp      | intestine: SRR5507183                                             |
| <i>Oreolalax rhodostigmatus</i>   | RNA-seq, PE 150 bp      | SRR6265740                                                        |
| <i>Pelobates fuscus</i>           | RNA-seq, PE 90 bp       | SRR5119616                                                        |
| <i>Pelophylax lessonae</i>        | RNA-seq, PE 90 bp, PE   | SRR1164893                                                        |
| <i>Quasipaa boulengeri</i>        | RNA-seq, PE 100 bp, PE  | SRR2962603                                                        |
| <i>Rana catesbeiana</i>           | RNA-seq, PE 150 bp      | brain: SRR11583975<br>muscle: SRR11583974<br>stomach: SRR11583973 |
|                                   | <i>de novo</i> assembly | CDS: MT813450                                                     |
| <i>Rana sphenoccephala</i>        | RNA-seq, PE 150 bp      | brain: SRR11583972<br>muscle: SRR11583971<br>stomach: SRR11583970 |
|                                   | <i>de novo</i> assembly | CDS: MT813451                                                     |
| <i>Rattus norvegicus</i>          | NCBI reference sequence | NM_012504.1                                                       |
| <i>Rhinella marina</i>            | RNA-seq, PE 140 bp      | brain: SRR11583969<br>skin: SRR11583967                           |
|                                   | <i>de novo</i> assembly | CDS: MT813452                                                     |
| <i>Xenopus tropicalis</i>         | NCBI reference sequence | NM_204076.1                                                       |



502 **Table S3. Summary of the *de novo* genome assembly of *Leptodactylus fuscus***  
 503

|                                                   |                        |
|---------------------------------------------------|------------------------|
| Sequencer                                         | HiSeq X                |
| Assembly software                                 | Supernova 2.1.1        |
| Number of reads                                   | 775.95 million         |
| Read format                                       | Paired end 150 bp      |
| Effective read depth coverage                     | 48.35                  |
| Estimated genome size                             | 2.42 Gb                |
| Weighted mean molecule size                       | 29.36 kb               |
| Number of scaffolds $\geq$ 10 kb (long scaffolds) | 16,530                 |
| N50 contig size                                   | 19.69 kb               |
| N50 scaffold size                                 | 362.61 kb              |
| Assembly size (only scaffolds $\geq$ 10 kb)       | 1.26 Gb                |
| BUSCO version                                     | 4.0.5                  |
| Lineage dataset                                   | Tetrapoda_odb10        |
| Input genome format                               | supernove pseudohap2_2 |
| Total groups searched                             | 5310                   |
| Complete BUSCOs                                   | 3182 (60.0%)           |
| Complete and single-copy BUSCOs                   | 3041 (57.3%)           |
| Complete and duplicated BUSCOs                    | 141 (2.7%)             |
| Fragmented BUSCOs                                 | 669 (12.6%)            |
| Missing BUSCOs                                    | 1459 (27.4%)           |

504

505 **Table S4. Fisher’s exact test (FET) for the likelihood of site-wise support of “Non-**  
506 **Concerted” and “Concerted” topologies.**  
507

|               | # sites | Non-Concerted<br>topology | Concerted<br>topology | FET p-value |
|---------------|---------|---------------------------|-----------------------|-------------|
| Nonsynonymous | 28      | 17                        | 11                    | 3.2e-8      |
| Synonymous    | 164     | 9                         | 153                   |             |

508  
509

510  
511  
512

**Table S5. List of primers used for intron sequencing**

| <b>Species</b>                         | <b>Primer</b>                                                               |
|----------------------------------------|-----------------------------------------------------------------------------|
| <i>Engystomops<br/>pustulosus</i>      | N-terminal                                                                  |
|                                        | Forward: EP_wwBC6_1F<br>GATGTAGAGGGTACGGTTTGAGGCACATGGCGGCAAGAAGAA          |
|                                        | Reverse: EP_wwBC6_11R<br>GATGTAGAGGGTACGGTTTGAGGCGTGGAGCATCGGTCCAGGA        |
|                                        | C-terminal                                                                  |
|                                        | Forward: EP_wwBC7_11F<br>GGCTCCATAGGAACTCACGCTACTGATCCTGGACCGATGCTCCA       |
|                                        | Reverse: EP_wwBC7_19R<br>GGCTCCATAGGAACTCACGCTACTTGACAATGCTGACGAAGAAGGC     |
| <i>Lithodytes<br/>lineatus</i>         | Forward: Lep_wwBC3_1F<br>TACATGCTCCTGTTGTTAGGGAGGACATGGCGGCAAGAAGAA         |
|                                        | Reverse: Lep_wwBC3_21R<br>TACATGCTCCTGTTGTTAGGGAGGAGGCACAGAACCACCATGT       |
|                                        | Forward: Lep_wwBC5_1F<br>ACAGCATCAATGTTTGGCTAGTTGACATGGCGGCAAGAAGAA         |
| <i>Leptodactylus<br/>pentadactylus</i> | Reverse: Lep_wwBC5_21R<br>ACAGCATCAATGTTTGGCTAGTTGAGGCACAGAACCACCATGT       |
|                                        | Forward: Lep_wwBC2_1F<br>AGGTGATCCCAACAAGCGTAAGTAACATGGCGGCAAGAAGAA         |
| <i>Leptodactylus<br/>latrans</i>       | Reverse: Lep_wwBC2_21R<br>AGGTGATCCCAACAAGCGTAAGTAAGGCACAGAACCACCATGT       |
|                                        | Forward: Lep_wwBC1_1F<br>AACGGAGGAGTTAGTTGGATGATCACATGGCGGCAAGAAGAA         |
| <i>Leptodactylus<br/>insularum</i>     | Reverse: Lep_wwBC1_21R<br>AACGGAGGAGTTAGTTGGATGATCAGGCACAGAACCACCATGT       |
|                                        | Forward: Lep_wwBC8_23F<br>AGAGGGTACTATGTGCCTCAGCACAAGTATGAGCCCAGCCACTTC     |
| <i>Leptodactylus<br/>colombiensis</i>  | Reverse: Lep_wwBC8_3044R<br>AGAGGGTACTATGTGCCTCAGCACCCAGGGCTGCGTCTGATGATTAA |

513

514 **Table S6. List of engineered ATP1A1 constructs used to test functional effects of amino**  
 515 **acid substitutions in *Leptodactylus*.**

516

| Construct Name | Engineered Substitution(s)                                                                  | Description                                                                                                           |
|----------------|---------------------------------------------------------------------------------------------|-----------------------------------------------------------------------------------------------------------------------|
| S              | -                                                                                           | Sensitive (S) paralog of <i>L. latrans</i> ATP1A1                                                                     |
| S+Q111R        | Q111R                                                                                       | Q111R on the S paralog background                                                                                     |
| S+N122D        | N122D                                                                                       | N122D on the S paralog background                                                                                     |
| S+Q111R+N122D  | Q111R + N122D                                                                               | Q111R and N122D on the S paralog background                                                                           |
| S+10subs       | A112T, E116D, I135V,<br>L180Q, I199L, I279V,<br>S403C, L536M, Q701L,<br>I788M               | All substitutions strongly distinguishing R and S<br>paralogs, except Q111R and N122D, on the S<br>paralog background |
| R-Q111R-N122D  | R111Q, D122N                                                                                | Reversions R111Q and D122N on the R paralog<br>background                                                             |
| S+12subs       | Q111R, A112T, E116D,<br>N122D, I135V, L180Q,<br>I199L, I279V, S403C,<br>L536M, Q701L, I788M | Twelve substitutions strongly distinguishing R<br>and S paralogs on the S paralog background                          |
| R              | -                                                                                           | Resistant (R) paralog of <i>L. latrans</i> ATP1A1                                                                     |

517 Note: R and S paralogs of *L. latrans* differ by the 12 substitutions that are the focus of this study  
 518 and by 9 additional amino-acid substitutions and a two-amino acid insertion-deletion difference.  
 519 Our experiments revealed that these 10 *latrans*-specific substitutions do not contribute detectably  
 520 to S vs. R differences in CG resistance of enzyme function (using all 10 as one co-variate,  
 521 ANOVA  $p > 0.5$ ). Following convention, positions of substitutions are standardized relative to the  
 522 sheep (*Ovis aries*) sequence NM\_001009360 - 5 AA from 5' end.  
 523

524 **Table S7. Summary of the ouabain sensitivity and catalytic properties of Na<sup>+</sup>,K<sup>+</sup>-ATPase**  
 525 **for each ATP1A1 construct.** The values represent the mean and standard deviation (SD)  
 526 ouabain sensitivity (log<sub>10</sub>IC<sub>50</sub>) of ATPase activity of six biological replicates. ATP1B1 of  
 527 *Leptodactylus latrans* was co-expressed with ATP1A1.  
 528

| ATP1A1<br>Constructs | Ouabain sensitivity (mol/L)<br>Mean(log <sub>10</sub> IC <sub>50</sub> ) ± SD | ATPase activity<br>nmol Pi/(mg protein*min) ± SD |
|----------------------|-------------------------------------------------------------------------------|--------------------------------------------------|
| S                    | -5.63 ± 0.59                                                                  | 16.30 ± 5.01                                     |
| S+Q111R              | -4.89 ± 0.85                                                                  | 10.68 ± 3.71                                     |
| S+N122D              | -5.06 ± 0.66                                                                  | 7.16 ± 3.62                                      |
| S+Q111R+N122D        | -3.62 ± 0.28                                                                  | 8.29 ± 3.86                                      |
| S+10subs             | -5.82 ± 0.47                                                                  | 16.37 ± 3.05                                     |
| R-Q111R-N122D        | -5.60 ± 0.33                                                                  | 17.41 ± 2.87                                     |
| S+12subs             | -3.23 ± 0.75                                                                  | 12.17 ± 2.43                                     |
| R                    | -3.25 ± 0.77                                                                  | 14.09 ± 2.77                                     |

529  
 530  
 531

532 **Table S8. Statistical analysis of ouabain sensitivity and ATPase activity.** Significant p values  
 533 are highlighted in bold.

| (Explanatory Variables)<br>ANOVA | Ouabain sensitivity      |      |       |                | ATPase activity          |       |       |               |
|----------------------------------|--------------------------|------|-------|----------------|--------------------------|-------|-------|---------------|
|                                  | log10(IC <sub>50</sub> ) |      |       |                | nmol Pi/(mg protein*min) |       |       |               |
|                                  | df                       | MS   | F     | p value        | df                       | MS    | F     | p value       |
| Q111R                            | 1, 42                    | 42.8 | 107.8 | <b>2.7e-13</b> | 1, 42                    | 83.0  | 6.9   | <b>0.015</b>  |
| N122D                            | 1, 42                    | 11.8 | 27.72 | <b>2.3e-6</b>  | 1, 42                    | 101.4 | 7.98  | <b>7.2e-3</b> |
| 10subs                           | 1, 42                    | 0.59 | 1.6   | 0.22           | 1, 42                    | 228.1 | 17.96 | <b>1.2e-4</b> |
| R-S background                   | 1, 42                    | 0.04 | 1.9   | 0.74           | 1, 42                    | 11.5  | 0.34  | 0.34          |
| Q111R:N122D                      | -                        | -    | -     | -              | 1, 42                    | 7.6   | 5.64  | <b>0.022</b>  |

534  
535

| (Explanatory Variables)<br>Linear regression | Ouabain sensitivity      |      |       |                  | ATPase activity          |      |       |               |
|----------------------------------------------|--------------------------|------|-------|------------------|--------------------------|------|-------|---------------|
|                                              | log10(IC <sub>50</sub> ) |      |       |                  | nmol Pi/(mg protein*min) |      |       |               |
|                                              | Est                      | SE   | t     | p value          | Est                      | SE   | t     | p value       |
| Intercept                                    | -6.03                    | 0.17 | -36.3 | <b>&lt;2e-16</b> | 14.3                     | 1.19 | 12.1  | <b>3e-15</b>  |
| Q111R                                        | 1.32                     | 0.21 | 6.27  | <b>2.7e-13</b>   | -4.39                    | 1.88 | -2.34 | <b>0.024</b>  |
| N122D                                        | 1.14                     | 0.21 | 5.45  | <b>2.3e-6</b>    | -6.81                    | 1.88 | -3.63 | <b>7.7e-4</b> |
| 10subs                                       | 0.26                     | 0.22 | 1.19  | 0.24             | 1.94                     | 1.46 | 17.96 | 0.18          |
| R-S background                               | -0.08                    | 0.26 | -0.34 | 0.74             | 1.39                     | 1.46 | 0.34  | 0.35          |
| Q111R:N122D                                  | -                        | -    | -     | -                | 6.90                     | 2.91 | 5.64  | <b>0.022</b>  |

536  
 537 Note: “R-S background” in the ANOVA refers to 9 additional amino acid substitutions and a two  
 538 amino acid insertion-deletion difference that distinguishes the R and S constructs (derived from  
 539 *Leptodactylus latrans*).

540  
541  
542  
543

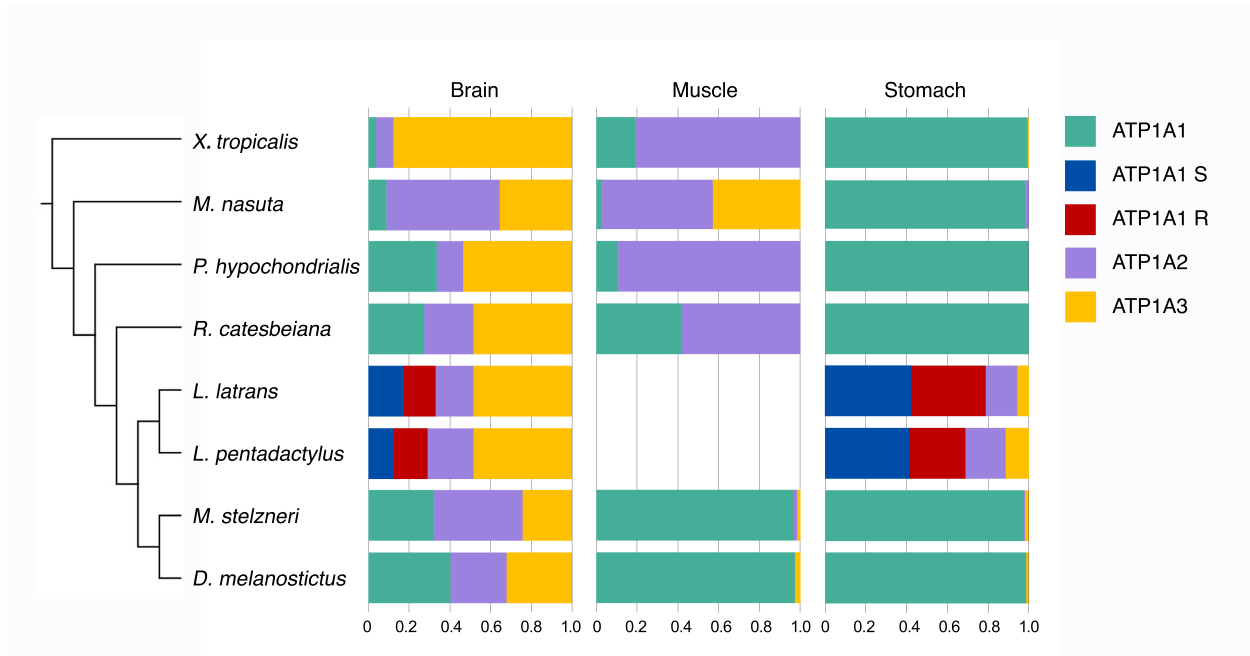

545

546 **Fig S1. Proportion of ATP1A1, ATP1A2, and ATP1A3 paralogs in brain, muscle, and**  
 547 **stomach of seven anuran species.** RNA-seq reads for eight species were mapped to species-  
 548 specific copies of ATP1A1, ATP1A2, and ATP1A3 using bwa (see Methods). Uniquely mapped  
 549 reads were counted for each paralog and estimated as a proportion of the sum of the reads for all  
 550 three ATP1A paralogs. *X. tropicalis*: *Xenopus tropicalis*; *M. nasuta*: *Megophrys nasuta*; *P.*  
 551 *hypochondrialis*: *Phyllomedusa hypochondrialis*; *R. catesbeiana*: *Rana catesbeiana*; *L. latrans*:  
 552 *Leptodactylus latrans*; *L. pentadactylus*: *Leptodactylus pentadactylus*; *M. stelzneri*:  
 553 *Melanophryniscus stelzneri*; *D. melanostictus*: *Duttaphrynus melanostictus*.

554

| Family          | Species                             | ATP1A1 |   |   |   |   |   |   |   |   |   | ATP1A2 |   |   |   |   |   |   |   |   |   | ATP1A3 |   |   |   |   |   |   |   |   |   |
|-----------------|-------------------------------------|--------|---|---|---|---|---|---|---|---|---|--------|---|---|---|---|---|---|---|---|---|--------|---|---|---|---|---|---|---|---|---|
|                 |                                     | 1      | 1 | 1 | 1 | 1 | 1 | 1 | 1 | 1 | 1 | 1      | 1 | 1 | 1 | 1 | 1 | 1 | 1 | 1 | 1 | 1      | 1 | 1 | 1 | 1 | 1 | 1 | 1 | 1 | 1 |
|                 |                                     | 1      | 1 | 1 | 1 | 1 | 1 | 1 | 1 | 1 | 1 | 1      | 1 | 1 | 1 | 1 | 1 | 1 | 1 | 1 | 1 | 1      | 1 | 1 | 1 | 1 | 1 | 1 | 1 | 1 |   |
|                 |                                     | 0      | 1 | 1 | 1 | 1 | 1 | 1 | 1 | 2 | 0 | 1      | 1 | 1 | 1 | 1 | 2 | 2 |   |   | 0 | 1      | 1 | 1 | 1 | 1 | 2 | 2 |   |   |   |
|                 |                                     | 8      | 1 | 2 | 4 | 5 | 6 | 7 | 9 | 0 | 8 | 1      | 2 | 4 | 5 | 6 | 7 | 9 | 0 | 2 | 8 | 1      | 2 | 4 | 5 | 6 | 7 | 9 | 0 | 2 |   |
|                 |                                     | Y      | Q | A | T | E | E | E | Q | N | Y | Q      | A | M | E | D | E | Q | N | N | Y | Q      | A | T | E | D | D | S | G | N |   |
| Human           | <i>Homo sapiens</i>                 | .      | . | . | . | . | . | . | . | . | . | .      | . | . | . | S | . | . | . | . | . | .      | . | . | . | . | . | . | . |   |   |
| Brown rat       | <i>Rattus norvegicus</i>            | .      | R | S | . | . | . | . | P | D | . | L      | . | . | . | S | . | . | . | . | . | .      | . | . | . | . | . | . | . |   |   |
| Bombinatoridae  | <i>Bombina maxima</i>               | .      | . | . | . | D | . | . | . | . | . | .      | . | . | . | . | . | . | . | . | . | .      | . | . | . | . | . | . | . |   |   |
| Pipidae         | <i>Xenopus tropicalis</i>           | .      | T | . | . | . | . | T | . | . | . | I      | . | . | . | I | . | . | . | . | L | .      | M | . | E | E | . | . | . |   |   |
| Pelobatidae     | <i>Pelobates fuscus</i>             | .      | . | . | . | . | . | . | . | . | . | I      | . | . | . | I | . | . | . | . | . | .      | . | . | . | . | A | . | . |   |   |
| Megophryidae    | <i>Megophrys nasuta</i>             | .      | . | . | . | . | . | N | . | . | . | .      | . | . | . | . | . | . | . | . | . | .      | . | . | . | . | A | . | . |   |   |
| Megophryidae    | <i>Oreolalax rhodostigmatus</i>     | .      | . | . | . | . | . | . | . | . | . | I      | . | . | . | I | . | . | . | . | . | .      | . | . | . | . | . | . | . |   |   |
| Megophryidae    | <i>Leptobranchium boringii</i>      | .      | . | . | . | . | . | . | . | . | . | .      | . | . | . | . | . | . | . | . | . | .      | . | . | . | . | A | . | . |   |   |
| Microhylidae    | <i>Kaloula pulchra</i>              | .      | . | . | . | D | . | . | . | . | . | I      | . | . | . | I | . | . | . | . | . | .      | . | . | . | . | . | . | . |   |   |
| Mantellidae     | <i>Mantella betsileo</i>            | .      | . | . | . | . | . | . | . | . | . | .      | . | . | . | . | . | . | . | . | I | M      | . | E | I | N | . | . | . |   |   |
| Dicroglossidae  | <i>Quasipaa boulengeri</i>          | .      | . | . | . | D | . | . | . | . | . | .      | . | . | . | . | . | . | . | . | . | .      | . | . | . | . | . | . | . |   |   |
| Dicroglossidae  | <i>Fejervarya cancrivora</i>        | .      | . | . | . | D | . | . | . | . | . | I      | . | . | . | I | . | . | . | . | . | .      | . | . | . | . | . | . | . |   |   |
| Ranidae         | <i>Pelophylax lessonae</i>          | .      | . | . | . | . | . | . | . | . | . | I      | . | . | . | I | . | . | . | . | . | .      | . | . | . | . | A | N | . |   |   |
| Ranidae         | <i>Odorrana tormota</i>             | .      | . | . | . | . | . | . | . | . | . | I      | . | . | . | I | . | . | . | . | M | .      | . | . | . | . | A | N | . |   |   |
| Ranidae         | <i>Rana sphenoccephala</i>          | .      | I | M | . | D | . | I | . | . | . | I      | . | . | . | I | . | . | . | . | L | .      | . | . | . | . | N | . | . |   |   |
| Ranidae         | <i>Rana catesbeiana</i>             | .      | . | . | . | . | . | . | . | . | . | I      | . | . | . | I | . | . | . | . | L | .      | . | . | . | . | N | . | . |   |   |
| Myobatrachidae  | <i>Limnodynastes peronii</i>        | .      | . | . | . | . | . | . | . | . | . | I      | . | . | . | I | . | . | . | . | . | .      | . | . | . | . | A | N | . |   |   |
| Hylidae         | <i>Cyclorana alboguttata</i>        | .      | . | . | . | . | . | . | . | . | . | I      | . | . | . | I | . | . | . | . | . | .      | . | . | . | . | . | . | . |   |   |
| Hylidae         | <i>Phyllomedusa hypochondrialis</i> | .      | . | . | . | . | . | . | . | . | . | I      | . | . | . | I | . | . | . | . | . | .      | . | . | . | . | A | . | . |   |   |
| Craugastoridae  | <i>Craugastor fitzingeri</i>        | .      | . | . | . | . | . | . | . | . | . | I      | . | . | . | I | . | . | . | . | . | .      | . | . | . | . | . | . | . |   |   |
| Strabomantidae  | <i>Oreobates cruralis</i>           | .      | . | . | . | . | . | . | . | . | . | I      | . | . | . | I | . | . | . | . | . | .      | . | . | . | . | . | . | . |   |   |
| Leptodactylidae | <i>Engystomops pustulosus</i>       | .      | . | . | . | . | . | . | . | . | . | I      | . | . | . | I | . | . | . | . | . | .      | . | . | . | . | A | . | . |   |   |
| Leptodactylidae | <i>Lithodytes lineatus</i>          | .      | . | . | . | D | . | . | . | . | . | I      | . | . | . | I | . | . | . | . | . | .      | . | . | . | . | . | . | . |   |   |
| Leptodactylidae | <i>Leptodactylus latrans</i> S      | .      | . | . | . | . | . | . | . | . | . | I      | . | . | . | I | . | . | . | . | . | .      | . | . | . | . | A | . | . |   |   |
| Leptodactylidae | <i>Leptodactylus latrans</i> R      | .      | R | T | . | D | . | . | D | . | . | I      | . | . | . | I | . | . | . | . | . | .      | . | . | . | . | . | . | . |   |   |
| Dendrobatidae   | <i>Dendrobates auratus</i>          | .      | . | . | . | . | . | . | . | . | . | I      | . | . | . | I | . | . | . | . | . | .      | . | . | . | . | T | . | . |   |   |
| Bufo            | <i>Melanophryniscus stelzneri</i>   | H      | L | V | . | D | . | N | . | . | . | I      | . | . | . | M | . | . | . | . | . | .      | . | . | . | . | N | A | N |   |   |
| Bufo            | <i>Atelopus zeteki</i>              | .      | R | K | S | D | L | . | D | . | . | .      | . | . | . | . | . | . | . | . | . | .      | . | . | . | . | . | . | . |   |   |
| Bufo            | <i>Duttaphrynus melanostictus</i>   | .      | R | K | S | D | L | . | D | . | . | T      | V | I | . | D | T | . | . | . | L | .      | . | . | . | E | R | . | . |   |   |
| Bufo            | <i>Bufo viridis</i>                 | .      | R | K | S | D | L | . | D | . | . | T      | V | I | . | D | T | . | . | . | R | K      | S | D | L | E | D | N | . |   |   |
| Bufo            | <i>Rhinella marina</i>              | .      | R | K | S | D | L | . | D | . | . | .      | . | . | . | . | . | . | . | . | L | .      | . | . | . | E | R | . | . |   |   |

555

556 **Fig S2. Variation among sites implicated in CG-resistance for ATP1A paralogs of various**  
557 **species.** Sequences of ATP1A2 and ATP1A3 were reconstructed using the same method as  
558 ATP1A1 described in Materials and Methods. Consensus sequences of anuran species were  
559 generated in MEGA 7.0 and used as reference for each paralog. Only sites implicated in CG-  
560 resistance are shown. Following convention, positions of substitutions, shown at the top, are  
561 aligned relative to the sheep (*Ovis aries*) sequence NM\_001009360 subtracting 5 AA from 5'end  
562 (e.g., the first position is 108). A dot indicates identity with the reference sequence. ATP1A1S  
563 and ATP1A1R of *Leptodactylus latrans* are indicated in blue and red, respectively. Bufo  
564 (toad) species, the prey species that produce CG toxins, are highlighted in purple. Blank: missing  
565 data. We failed to identify an ortholog of ATP1A4 in any of the available anuran genome  
566 assemblies, including our assembly of *Leptodactylus fuscus*.

567

568

569



570  
571

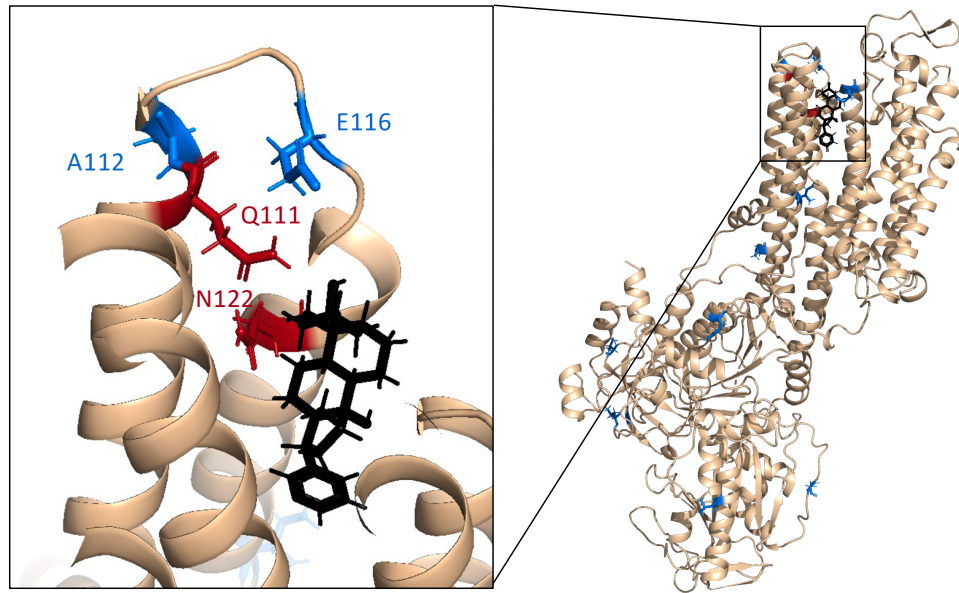

572

573 **Fig S3. Positions of 12 R copy-specific amino acid substitutions on the crystal structure of**  
574 **pig ATP1A1 bound to the cardiac glycoside bufalin.** Red residues correspond to key CG  
575 resistance-conferring sites 111 and 122; blue residues correspond to 10 additional residues  
576 strongly associated with variants at sites 111 and 122. (*Sus scrofa*, PDB 4RES.)

577

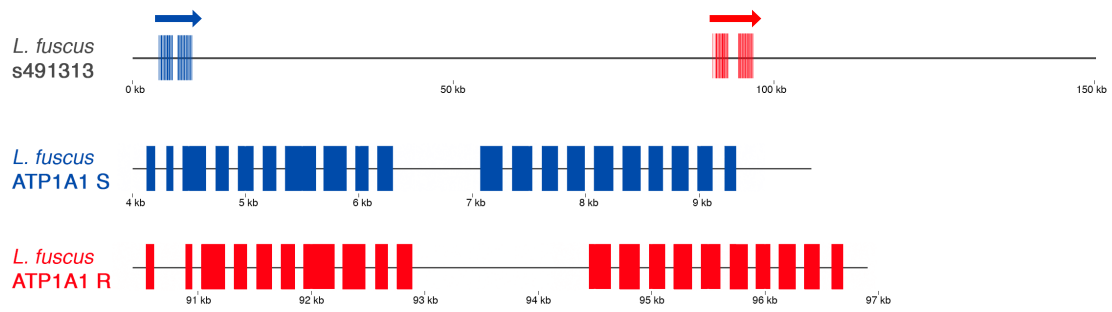

578

579 **Fig S4. Annotation of ATP1A1S and ATP1A1R paralogs in the *Leptodactylus fuscus de***  
 580 ***novo* genome assembly (Table S3).** ATP1A1S (blue) and ATP1A1R (red) occur in tandem on  
 581 scaffold s491313 (Genbank Acc#) ~80 kilobases apart. The boundary between exons and introns  
 582 were determined by blast and manual correction (*i.e.*, ensuring that each intron started with GT  
 583 and ended with AG). The gene structure figures were plotted with ggbio in R.

584

585

0.1

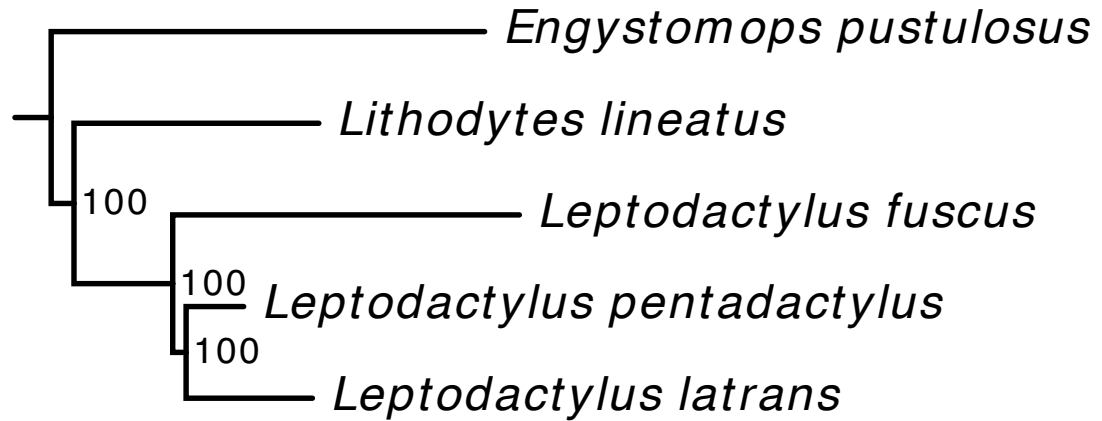

586

587

**Figure S5. A phylogenetic tree of *Leptodactylus* and outgroup species.** The tree was

588

constructed using an alignment of 813 orthologous mRNA sequences under the best partition

589

model with iq-tree 2.0 (see Methods). Branch lengths: (*Engystomops pustulosus*:0.699436,

590

(*Lithodytes lineatus*:0.395135, (*Leptodactylus fuscus*:0.559378, (*Leptodactylus pentadactylus*:

591

0.092965, *Leptodactylus latrans*: 0.203845)100:0.0216082)100:0.159296)100:0.0368124).

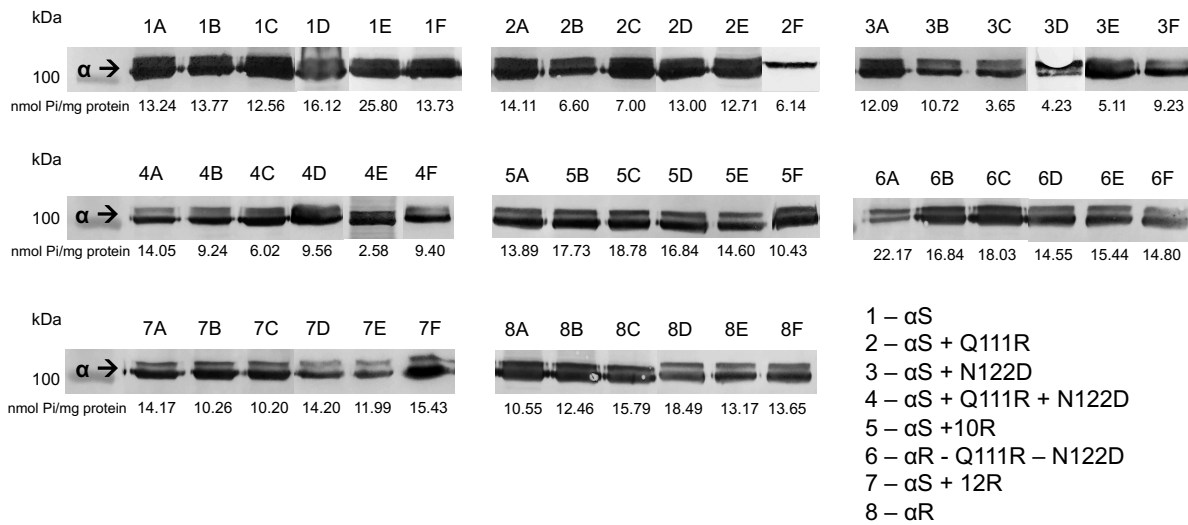

592

593 **Fig S6. Western blot analysis of Na<sup>+</sup>,K<sup>+</sup>-ATPase with engineered ATP1A1 (α) subunits**

594 **produced in this study.** The 110 kDa ATP1A1 protein is stained with the α5 monoclonal

595 antibody followed by a horseradish peroxidase conjugated goat antimouse antibody. Samples

596 represent six biological replicates of eight different recombinant Na<sup>+</sup>,K<sup>+</sup>-ATPase (Table S5)

597 produced through cell culture. All western blots are aligned to the same protein ladder level.

598 ATPase activity levels (nmol Pi/mg protein) of each biological replicate is indicated under its

599 respective band.

600

601

602

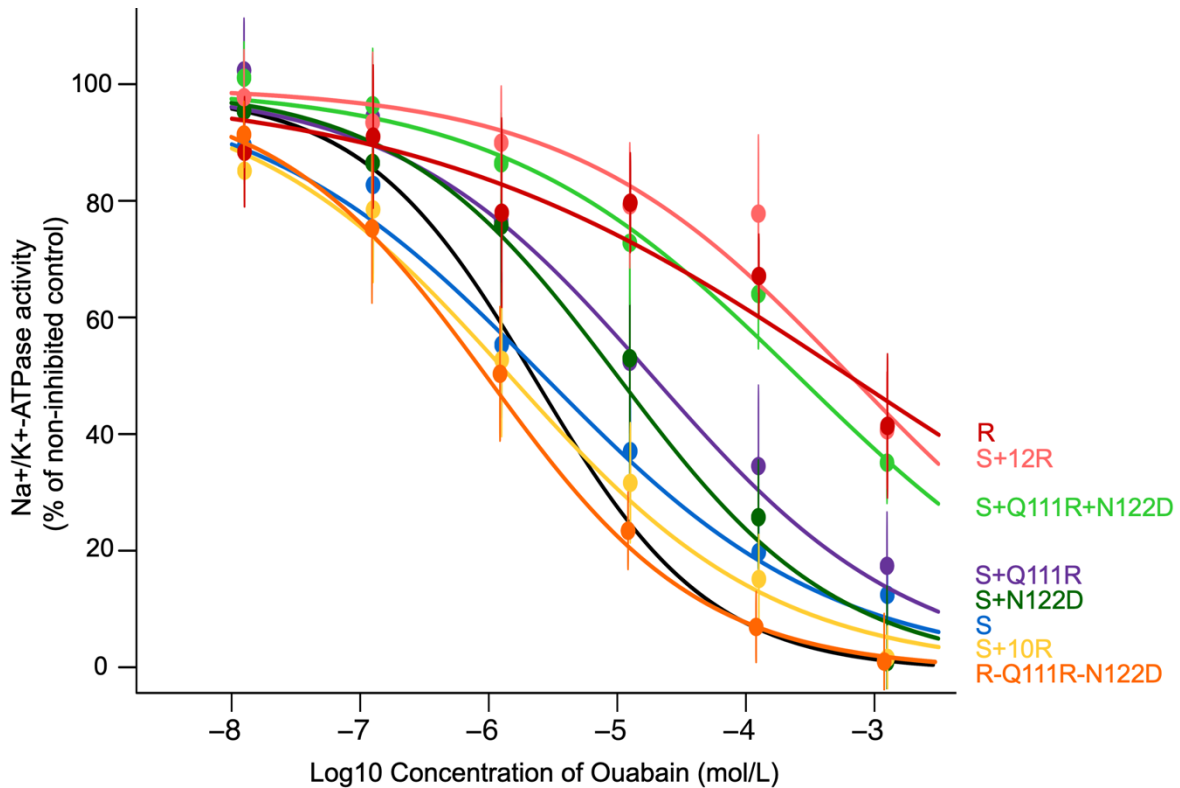

603

604 **Fig S7. Cardiac glycoside (ouabain) inhibition curves for six each engineered *Leptodactylus***

605 **Na<sup>+</sup>,K<sup>+</sup>-ATPase produced in this study.** Points and error bars represent the mean ± SEM (n=6

606 biological replicates) percentage of protein activity relative to controls measured in the absence

607 of ouabain and excluding the activity of background ATPases. The black inhibition curve was

608 measured from commercially procured porcine cerebral cortex (CAS 9000-83-3, Sigma-Aldrich,

609 Inc.) and represents a standard bench-mark reference for cardiac glycoside sensitivity (Log<sub>10</sub>

610 IC<sub>50</sub>= -5.61). The ATP1B1 of *Leptodactylus latrans* was co-expressed with each engineered

611 version of ATP1A1 (Table S5).

612
